# 1                                    **Corticosteroid and progesterone transactivation of** 2                                    **mineralocorticoid receptors from Amur sturgeon and tropical gar**

3  
4                                    Akira Sugimoto<sup>1</sup>, Kaori Oka<sup>1</sup>, Rui Sato<sup>1</sup>, Shinji Adachi<sup>2</sup>,  
5                                    Michael E. Baker<sup>3,\*</sup>, Yoshinao Katsu<sup>1,4,\*</sup>

6  
7                                    <sup>1</sup>Graduate School of Life Science, Hokkaido University, Sapporo, Japan; <sup>2</sup>Faculty of Fisheries  
8                                    Sciences, Hokkaido University, Hakodate, Japan; <sup>3</sup>Department of Medicine, University of  
9                                    California, San Diego, CA, USA; <sup>4</sup>Department of Biological Sciences, Hokkaido University,  
10                                    Sapporo, Japan

11  
12                                    \*Corresponding authors:

13                                    Michael E. Baker: mbaker@ucsd.edu

14                                    Yoshinao Katsu; ykatsu@sci.hokudai.ac.jp

## 15 16                                    **Abstract**

17                                    The response to a panel of steroids by the mineralocorticoid receptor (MR) from Amur sturgeon  
18                                    and tropical gar, two basal ray-finned fish, expressed in HEK293 cells was investigated.

19                                    Half-maximal responses (EC50s) for transcriptional activation of sturgeon MR by  
20                                    11-deoxycorticosterone, corticosterone, 11-deoxycortisol, cortisol and aldosterone, and  
21                                    progesterone were between 13 pM and 150 pM. For gar MR, EC50s were between 8 pM and 55  
22                                    pM. Such low EC50s support physiological regulation by these steroids of the MR in sturgeon  
23                                    and gar. Companion studies with human MR and zebrafish MR found higher EC50s compared  
24                                    to EC50s for sturgeon and gar MR, with EC50s for zebrafish MR closer to gar and sturgeon MR  
25                                    than was human MR. For zebrafish MR, EC50s were between 75 pM and 740 pM; for human  
26                                    MR, EC50s were between 65 pM and 2 nM. In addition to progesterone, spironolactone and  
27                                    19nor-progesterone were agonists for all three fish MRs, in contrast to their antagonist activity for  
28                                    human MR, which is hypothesized to involve serine-810 in human MR because all three steroids  
29                                    are agonists for a mutant human Ser810Leu-MR. Paradoxically, sturgeon, gar and zebrafish MRs  
30                                    contain a serine corresponding to serine-810 in human MR. Our data suggests alternative  
31                                    mechanism(s) for progesterone, spironolactone and 19nor-progesterone as MR agonists in these  
32                                    three ray-finned fishes and the need for caution in applying data for progesterone signaling in  
33                                    zebrafish to human physiology.

## 1 INTRODUCTION

2 The mineralocorticoid receptor (MR) is a transcription factor that belongs to the  
3 nuclear receptor family, a diverse group of transcription factors that also includes  
4 receptors for androgens (AR), estrogens (ER), glucocorticoids (GR) and progestins (PR),  
5 and other small lipophilic ligands, such as thyroid hormone and retinoids [1-5]. The  
6 MR and GR are descended from a common corticosteroid receptor (CR), which are  
7 present in lampreys and hagfish [5-7]. Several corticosteroids (Figure 1), including  
8 aldosterone (Aldo), cortisol (F), 11-deoxycortisol (S), corticosterone (B) and  
9 11-deoxycorticosterone (DOC), as well as progesterone (Prog), are transcriptional  
10 activators of Atlantic sea lamprey CR and hagfish CR [6]. Among these steroids, Aldo,  
11 the main physiological activator of the MR in human and other terrestrial vertebrates  
12 [8-11], had the lowest half-maximal response (EC50) for transcriptional activation of  
13 the CR. This strong response to Aldo is surprising because Aldo is not found in either  
14 lamprey or hagfish serum [6]. S, which along with DOC is present in Atlantic sea  
15 lamprey serum, has been found to have mineralocorticoid activity in lamprey [12, 13].

16 Distinct MR and GR genes first appear in cartilaginous fishes (Chondrichthyes),  
17 such as sharks, rays and skates [6, 14]. Carroll et al. [14] determined EC50s of several  
18 corticosteroids for skate MR; EC50s were 70 pM for Aldo, 30 pM for DOC, 90 pM for  
19 B, 1 nM for F and 22 nM for S. In teleosts, which comprise about 95% of known  
20 ray-fish species (*Actinopterygii*), corticosteroid activation of the MR has been  
21 investigated for cichlid [15], trout [16], carp [17], midshipman fish [18] and zebrafish  
22 [19], with Aldo, F and DOC being the principal steroids that were studied. Although  
23 Aldo has not been found in teleost fish [20], Aldo has a low EC50 for teleost MRs,  
24 similar to that found for Aldo activation of lamprey CR and skate MR. DOC also has  
25 a low EC50 for teleost MRs, and DOC has been proposed as mineralocorticoid in fish  
26 [16, 21-25]. F also has been proposed to be ligand for teleost fish MR [22, 24, 25].  
27 The response of the teleost MRs to B and S, which are found in fish [25, 26], has been  
28 studied only in trout, in which the EC50s are 10 nM for B and 3.7 nM for S [16].  
29 Interestingly, spironolactone (spiron) and Prog are agonists for trout MR [16], in  
30 contrast to their antagonist activity for human MR [16, 27]. Spiron also is an agonist  
31 for zebrafish MR [19]. Together, these studies indicate that several corticosteroid(s)  
32 are potential transcriptional activators of teleost MRs [22, 25, 28, 29].

33 An important gap in our understanding of the evolution of selectivity of  
34 ray-finned fish MRs for steroids is the absence of data on the MR in Chondrostei  
35 (sturgeons, paddlefishes, reedfishes, bichirs) and Holostei (bowfins, gars), which  
36 evolved before a fish-specific genome duplication occurred after the split of the

- 1 Acipenseriformes (sturgeons) and the Semionotiformes (gars) from the lineage leading
- 2 to teleost fish, but before the divergence of Osteoglossomorpha (Figure 2) [30-32].
- 3

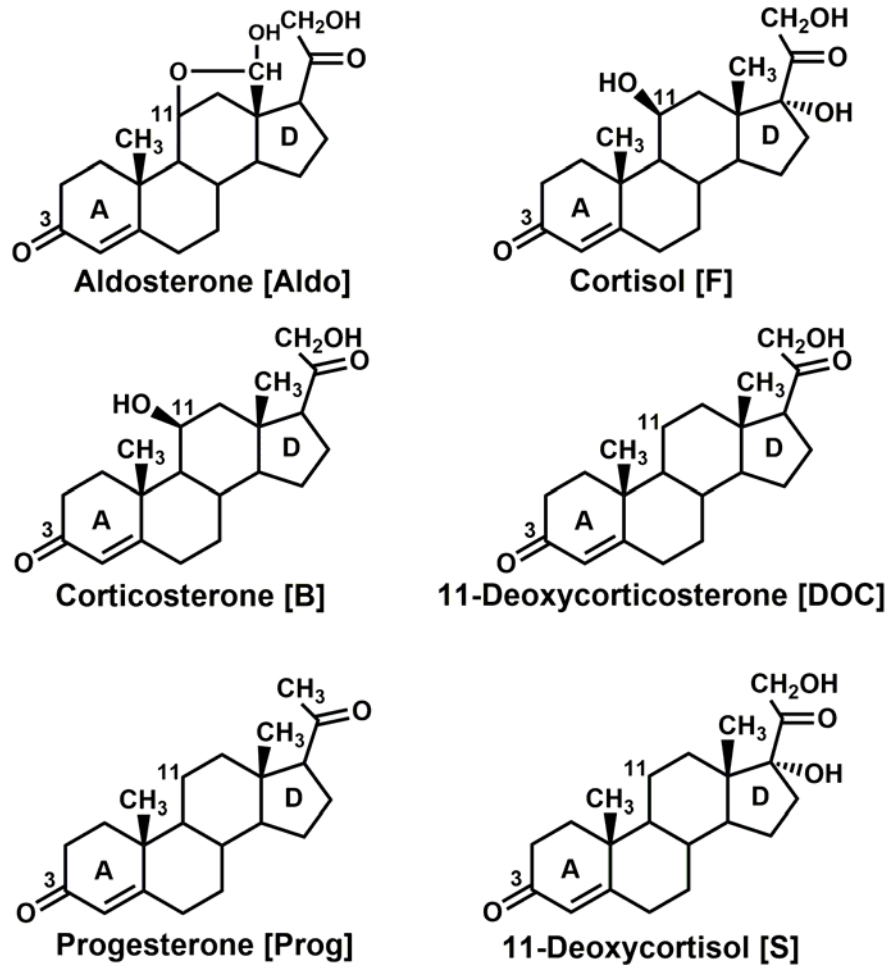

4

5

6 **Figure 1. Structures of potential steroid regulators of fish MR.**

7 Aldo, the physiological ligand for terrestrial vertebrate MRs, is not found in fish [20]. F and

8 DOC have been proposed to be mineralocorticoids in teleosts [22, 25]. S is a ligand for

9 corticosteroid receptor in lamprey [12]. Progesterone is an antagonist for human MR [27].

10

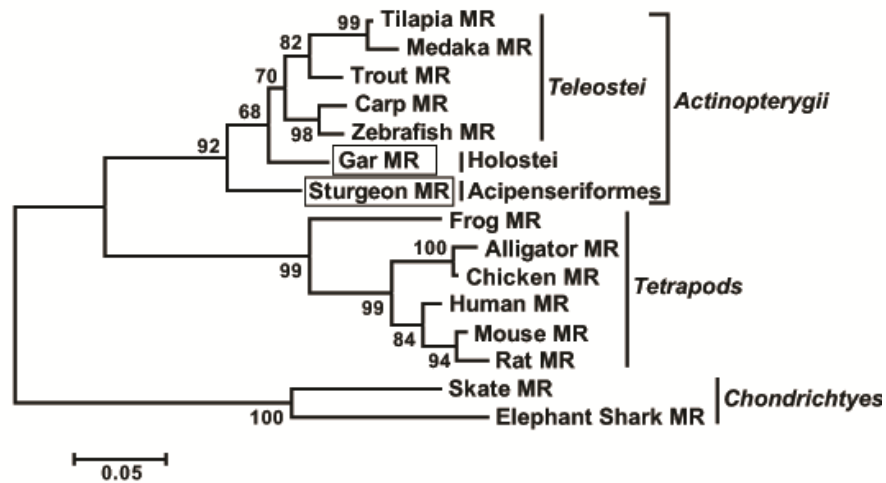

1

2 **Figure 2. Phylogenetic relationship of sturgeon and gar MRs to other vertebrates.**

3 To investigate the relationship of sturgeon and gar to other fish, we constructed a phylogenetic  
4 tree of the steroid-binding domains on MRs in sturgeon, gar, selected teleosts, elasmobranchs  
5 and tetrapods. The phylogenetic tree was constructed using the maximum likelihood with  
6 JTT+G model with 1000 bootstrap replications, which are shown as percentages at the nodes of  
7 the tree.

8

9 Our interest in the evolution of steroid hormone action [4, 5, 33, 34] prompted us to  
10 investigate transcriptional activation of the MR from Amur sturgeon, *Acipenser schrenckii*, and  
11 tropical gar, *Atractosteus tropicus* by a broad panel of corticosteroids (Aldo, F, B, DOC, S), Prog,  
12 spiron and 19nor-progesterone (19norP), a steroid that has not previously been studied for  
13 activation of fish MR. To gain further insight into the evolution of steroid specificity, we  
14 compared our results with companion studies of zebrafish and human MRs. In agreement with  
15 studies of teleost MRs, we find that Aldo and DOC have the lowest EC<sub>50</sub> (highest activity) for  
16 sturgeon and gar MRs. However, we also find that S, B, F, and Prog have low EC<sub>50</sub>s,  
17 consistent with these steroids also having a physiological role as ligands for these MRs. Spiron  
18 and 19norP also activated sturgeon and gar MRs. In comparison, zebrafish MR has a strong  
19 response to Aldo and DOC and a good response to B, F, S Prog, spiron and 19norP, while human  
20 MR has strong response to Aldo, DOC and B and a good response to F and S, and a weak  
21 response to Prog and 19norP and no response to spiron. The weak response to Prog and 19norP  
22 and absence of a response to spiron by human MR is in agreement with other studies [27, 35, 36].  
23 The strong response to 19norP, Prog and spiron of sturgeon, gar and zebrafish MR is perplexing  
24 because the basis for the low response to to these steroids by human MR is thought to be due to  
25 the presence of Ser-810 on  $\alpha$ -helix 5 [27, 37, 38]. 19norP, Prog and spiron are agonists for

1 human MR with Ser810Leu mutation [27, 37, 38]. Sturgeon, gar and zebrafish MRs contain a  
2 serine corresponding to serine-810 in human MR, suggesting the presence of an alternative  
3 mechanism for these steroids acting as MR agonists in these three ray-finned fishes, as well as  
4 the need to apply caution in interpreting data on Prog activity in zebrafish to human physiology.

## 6 **MATERIALS AND METHODS**

### 7 **Animals and chemical reagents**

8 Amur sturgeon and tropical gar were obtained as described previously [32]. All  
9 experimental procedures involving live fish followed the policies and guidelines of the Hokkaido  
10 University Animal Care and Use Committee. Aldosterone (Aldo) (CAS 52-39-1),  
11 corticosterone (B) (CAS 50-22-6), cortisol (F) (CAS 50-23-7), 11-deoxycortisol (S) (CAS  
12 152-58-9), 11-deoxycorticosterone (DOC) (CAS 64-85-7), progesterone (Prog) (CAS 57-83-0),  
13 19nor-progesterone (19norP) (CAS 472-54-8), spironolactone (Spiron) (CAS 52-01-7),  
14 5 $\alpha$ -dihydrotestosterone (DHT) (CAS 521-18-6), and 17 $\beta$ -estradiol (E2) (CAS 50-28-2) were  
15 purchased from Sigma-Aldrich. For the reporter gene assays, all hormones were dissolved in  
16 dimethyl-sulfoxide (DMSO) and the final concentration of DMSO in the culture medium did not  
17 exceed 0.1%.

### 19 **Molecular cloning of mineralocorticoid receptors**

20 Two conserved amino acid regions, GCHYGV and LYFAPD of vertebrate MRs were  
21 selected and degenerate oligonucleotides were used as primers for PCR. First-strand cDNA  
22 was synthesized from 2  $\mu$ g of total RNA isolated from the liver after amplification, and an  
23 additional primer set (CKVFFK and LYFAPD) was used for the second PCR. The amplified  
24 DNA fragments were subcloned with TA-cloning plasmid pGEM-T Easy vector, sequenced using  
25 a BigDye terminator Cycle Sequencing-kit with T7 and SP6 primers, and analyzed on the 3130  
26 Genetic Analyzer (Applied Biosystems). The 5'- and 3'-ends of the mineralocorticoid receptor  
27 cDNAs were amplified by rapid amplification of the cDNA end (RACE) using a SMART RACE  
28 cDNA Amplification kit.

### 30 **Database and sequence analysis**

31 MRs for phylogenetic analysis were collected with Blast searches of GenBank. A  
32 phylogenetic tree for MRs was constructed by the Neighbor-Joining Method [39] after sequences  
33 were aligned by MUSCLE [40] using several fish, frog, alligator, chicken, rat, mouse, human  
34 MRs. Maximum likelihood (ML) analysis was conducted using the JTT+G model. Statistical  
35 confidence for each branch in the tree was evaluated by the bootstrap method [41] with 1000  
36 replications. We used the MEGA5 program [42] for these analyses.

1

## 2 **Construction of plasmid vectors**

3 Full-coding regions of mineralocorticoid receptors were amplified by PCR with KOD  
4 DNA polymerase. PCR products were gel-purified and ligated into pcDNA3.1 vector. Mouse  
5 mammary tumor virus-long terminal repeat (MMTV-LTR) was amplified from pMSG vector by  
6 PCR, and inserted into pGL3-basic vector containing the *Photinus pyralis* luciferase gene. All  
7 constructs were verified by sequencing.

8

## 9 **Transactivation Assay**

10 Human embryonic kidney 293 (HEK293) cells were used in the reporter gene assay.  
11 Transfection and reporter assays were carried out as described previously [33], except that we  
12 used PEI-max as transfection reagent [43]. All transfections were performed at least three times,  
13 employing triplicate sample points in each experiment. The values shown are mean  $\pm$  SEM  
14 from three separate experiments, and dose-response data and EC50 were analyzed using  
15 GraphPad Prism.

16

## 17 **Statistical methods**

18 Results are presented as mean  $\pm$  SE (SEM) from three separate experiments. All  
19 multi-group comparisons were performed using one-way ANOVA followed by Bonferroni test.  
20 Dose-response data and EC50 were analyzed using GraphPad Prism.  $P < 0.05$  was considered  
21 statistically significant.

22

## 23 **RESULTS**

### 24 **Isolation of mineralocorticoid receptors from sturgeon and gar**

25 We cloned sturgeon MR cDNA containing an open reading frame encoding 953 amino  
26 acids (GenBank accession LC149818)], and gar MR cDNA containing an open reading frame  
27 encoding 987 amino acids (GenBank accession LC149819). Sturgeon and gar MR sequences  
28 can be divided into four domains (Figure 3). The overall amino acid identity between these two  
29 MRs was 72%, with particularly high sequence identities for the DBD (100%) and LBD (89%)  
30 (Figure 3). Comparison of sturgeon MR with five other species (human, chicken, alligator,  
31 *Xenopus*, and zebrafish) revealed that sturgeon MR had identities of 44-36% in A/B  
32 domains, 100-95% in DBDs, 67-47% in D domains, and 90-74% in LBDs (Figure 3).

33

### 34 **Phylogenetic analysis of ancient fish corticoid receptors**

35 To investigate the evolutionary position of gar and sturgeon MR in relationship to other  
36 fish MRs and tetrapods, we collected MR sequences from several teleosts, skates and elephant

1 shark and selected terrestrial vertebrates. Consistent with the evolution of Acipenseriformes  
 2 and Holostei, phylogenetic analysis places sturgeon and gar MRs close to the base of ray-finned  
 3 fish (Figure 2).  
 4

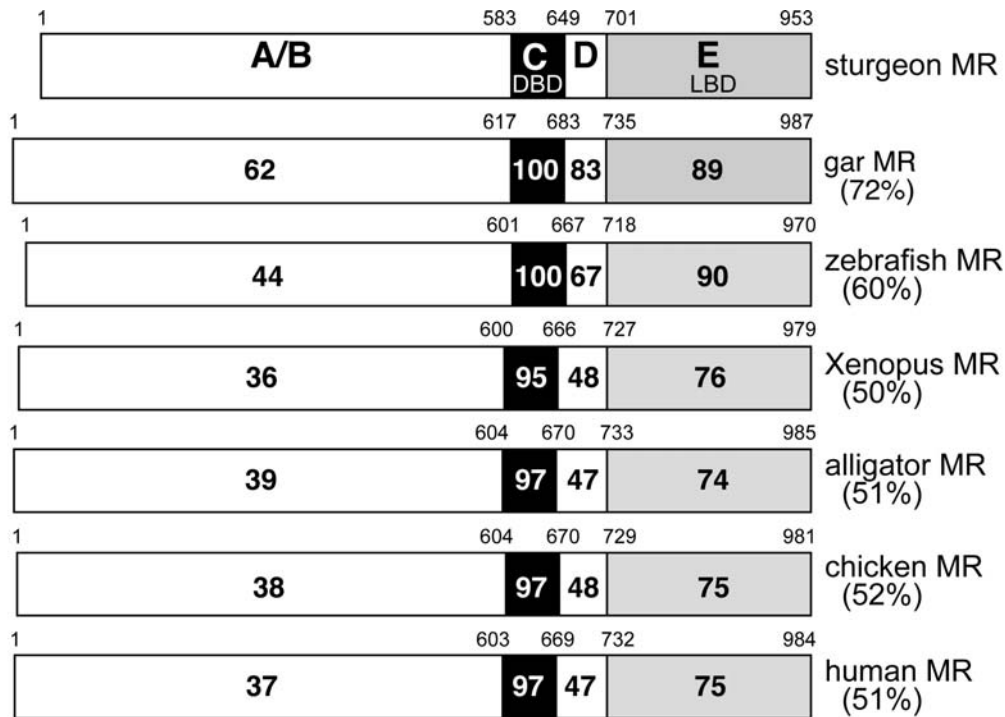

5  
 6 **Figure 3. Comparisons of functional domains in sturgeon, gar, zebrafish, *X. laevis*, alligator,**  
 7 **chicken and human MRs.**

8 Comparison of the domains in sturgeon MR gar, zebrafish, *X. laevis*, alligator, and human MR  
 9 MR. The functional A/B domain, C domain, D domain and E domain are schematically  
 10 represented with the numbers of amino acid residues at each domain boundary indicated. The  
 11 percentage of amino acid identity between domains is depicted. GenBank accession numbers  
 12 are: LC149818 for sturgeon MR; LC149819 for gar MR; NM\_001100403 for zebrafish MR;  
 13 NM\_001090605 for *Xenopus* MR; AB701406 for alligator MR; and NM\_000901 for human MR.

14  
 15  
 16 **Strong response to 3-keto-steroids by sturgeon and gar mineralocorticoid receptors**

17 We examined steroid-inducible transcriptional activation of gar and sturgeon MRs  
 18 using the MMTV-driven reporter construct [33, 44]. For comparison, we also examined  
 19 transcriptional activation of human MR and zebrafish MR. At 1 nM, Aldo, B, S, DOC, F and  
 20 Prog were strong inducers of luciferase activation by gar MR and sturgeon MR and by zebrafish

1 MR, with the exception of Prog which had a lower signal. These MRs show little stimulation  
2 by 1 nM DHT and E2 (Figure 4). At 1 nM, Aldo, B, DOC were strong transcriptional activators  
3 of human MR, which was activated to a lesser extent by S, and weakly activated by Prog (Figure  
4 4).  
5

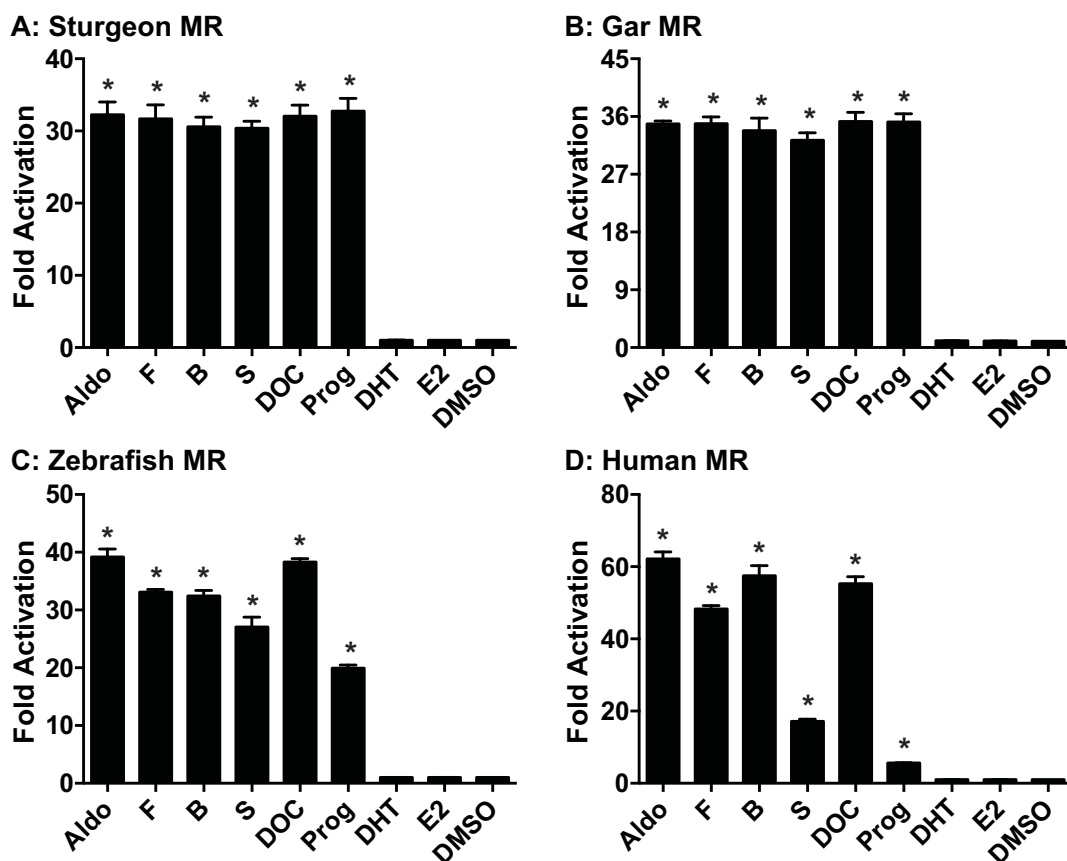

6 **Steroid Concentration = 1 nM**

7 **Figure 4. Ligand-specificities of fish and human MRs.**

8 Full-length sturgeon MR (A), gar MR (B), zebrafish (C), and human MR (D) were expressed in  
9 HEK293 cells with an MMTV-luciferase reporter. Cells were treated with  $10^{-8}$  M Aldo, F, B, S,  
10 DOC, Prog,  $5\alpha$ -dihydrotestosterone (DHT),  $17\beta$ -estradiol (E2) or vehicle alone (DMSO).  
11 Results are expressed as means  $\pm$  SEM, n=3. Y-axis indicates fold-activation compared to the  
12 activity of control vector with vehicle (DMSO) alone as 1.  
13

14 The agonist activity of Prog for sturgeon, gar and zebrafish MRs and for trout MR [16]  
15 and the evidence that spiron is an agonist for trout [16] and zebrafish MRs [19] stimulated us to  
16 examine transcriptional activation of sturgeon and gar MRs by spiron, an agonist for human MR.  
17 We also investigated transcriptional of sturgeon, gar and zebrafish MRs by 19norP, which, like  
18 Prog and spiron, is an agonist for human Ser810Leu-MR [27]. As shown in Figure 5, spiron



1 and 19norP are agonists for sturgeon, gar and zebrafish MRs.

2

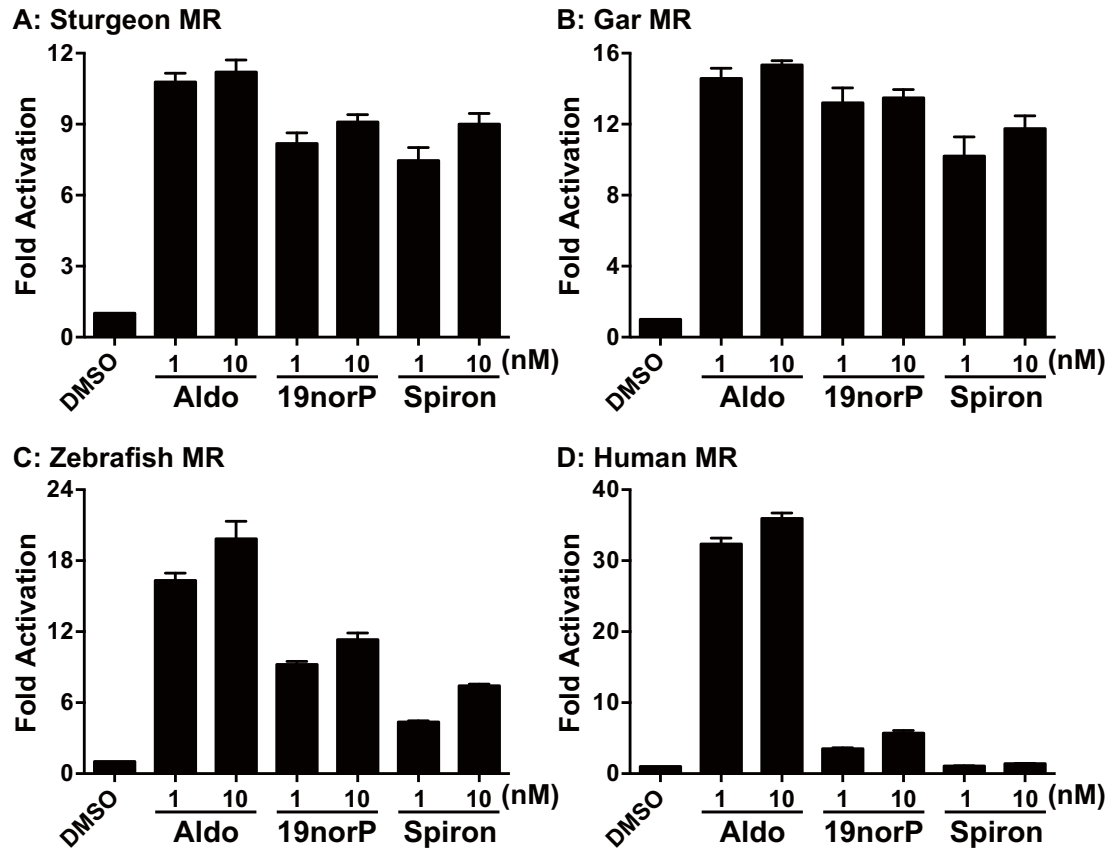

3

4

5 **Figure 5. Transcriptional activation by 19nor-progesterone and spironolactone of sturgeon,**  
6 **gar, zebrafish and human MRs.**

7 Full-length sturgeon MR (A), gar MR (B), zebrafish MR (C), and human MR (D) were  
8 expressed in HEK293 cells with an MMTV-luciferase reporter. Cells were treated with 1 nM or  
9 10 nM Aldo, 19norP or spiron or vehicle alone (DMSO). Results are expressed as means  $\pm$   
10 SEM, N=3 and represent fold-activation compared to the control vector with vehicle.

11

12 We examined concentration-dependent activation of gar, sturgeon, zebrafish, and  
13 human MRs by Aldo, F, B, DOC, S and Prog (Figure 6, Table 1). Both gar and sturgeon MRs  
14 had similar low EC50s, which varied from 7.7 pM to 150 pM for these steroids. For each  
15 steroid, the EC50s for gar MR were a little lower than for sturgeon MR.

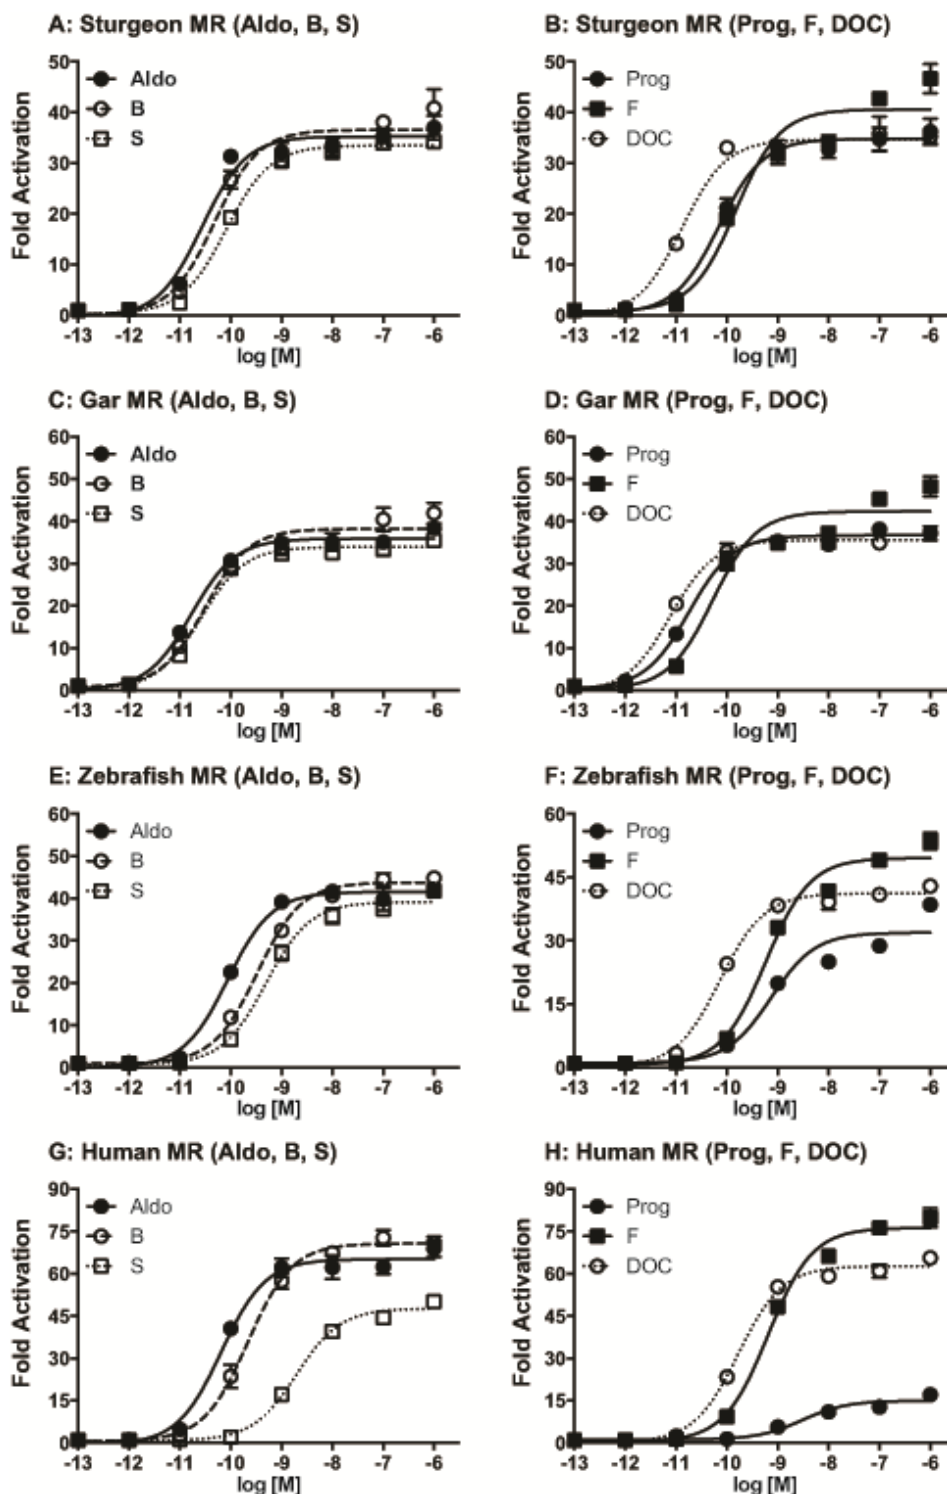

1

2 **Figure 6. Concentration-dependent transcriptional activities of fish and human MRs.**

3 Concentration-response profiles of full-length sturgeon MR (A and B), gar MR (C and D),  
4 zebrafish MR (E and F), and human MR (G and H) for various steroids. HEK293 cells were  
5 transiently transfected with the MMTV-containing vector together with an MR expression vector.  
6 Cells were incubated with increasing concentrations of Aldo, B, and S (A, C, E, and G) or Prog,

1 F, and DOC (B, D, F, and H) ( $10^{-13}$  to  $10^{-6}$ M). Data are expressed as a ration of steroid to  
 2 vehicle (DMSO). Each column represents the mean of triplicate determinations, and vertical  
 3 bars represent the mean  $\pm$  SEM.

4  
 5 **Table 1. EC50 activities for 3-keto-steroid transcriptional activation of sturgeon, gar,  
 6 zebrafish and human MRs**

|              | Aldo                  | DOC                   | B                     | S                     | F                     | Prog                  |
|--------------|-----------------------|-----------------------|-----------------------|-----------------------|-----------------------|-----------------------|
| Sturgeon MR  | $2.7 \times 10^{-11}$ | $1.3 \times 10^{-11}$ | $4.8 \times 10^{-11}$ | $8.2 \times 10^{-11}$ | $1.5 \times 10^{-10}$ | $7.0 \times 10^{-11}$ |
| Gar MR       | $1.7 \times 10^{-11}$ | $7.7 \times 10^{-12}$ | $3.1 \times 10^{-11}$ | $2.6 \times 10^{-11}$ | $5.3 \times 10^{-11}$ | $1.8 \times 10^{-11}$ |
| Zebrafish MR | $8.8 \times 10^{-11}$ | $7.4 \times 10^{-11}$ | $3.3 \times 10^{-10}$ | $5.0 \times 10^{-10}$ | $5.9 \times 10^{-10}$ | $7.4 \times 10^{-10}$ |
| Human MR     | $6.5 \times 10^{-11}$ | $1.7 \times 10^{-10}$ | $2.2 \times 10^{-10}$ | $2.0 \times 10^{-9}$  | $6.5 \times 10^{-10}$ | -                     |

7

8

9 In comparison, EC50s of Aldo, B and F were similar for zebrafish and human MR and  
 10 a little higher than their EC50s for sturgeon and gar MR. EC50s of DOC, S and Prog for  
 11 zebrafish MR were higher than their EC50s for sturgeon and gar MR, but lower than the EC50s  
 12 for human MR. Prog had a lower, but still significant, maximal activation for zebrafish MR  
 13 while 100 nM Prog had little activation of human MR. Overall all corticosteroids and Prog had  
 14 EC50s that would be consistent with a physiological role in transcription of the MR in sturgeon,  
 15 gar and zebrafish (Table 1, Figure 6).

16 In human MR, Ser-810 and Ala-773 are important in the low transcriptional activity of  
 17 Prog. Prog, spiron and 19norP can activate human MR with selective mutations at either  
 18 Ser-810 or Ala-773 [27, 37, 38]. For example, at 1 nM, prog, spiron and 19norP are agonist for  
 19 a Ser810Leu mutant MR [27, 37, 38]. We extracted the sequence of helices 3-5, which contain  
 20 Ser-810 and Ala-773, from sturgeon, gar and zebrafish MR (Figure 7) and other teleosts. All of  
 21 these ray-finned fish contain a serine and alanine that aligns with Ser-810 and Ala-773 in human  
 22 MR.

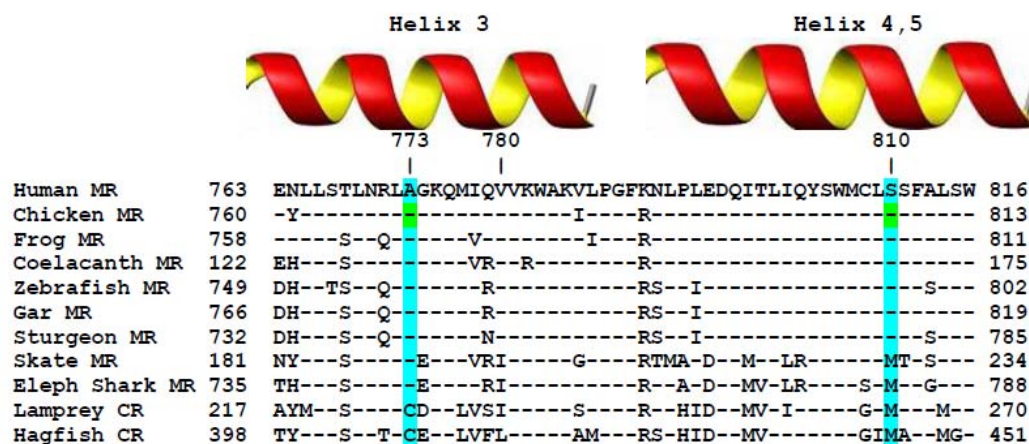

23

24 **Figure 7. Alignment of vertebrate MRs to Serine-810 and Alanine-773 in**

1 **human MR.**

2 Human Ser-810 and Ala-773 are conserved in ray-finned fish MRs. Skate MR, elephant shark  
3 MR, lamprey CR and hagfish CR contain a methionine corresponding to human Ser-810.  
4 Lamprey CR and hagfish CR contain a cysteine corresponding to Ala-773 in human MR.  
5 Amino acids that are identical to amino acids in human MR are denoted by (-).  
6

7 **DISCUSSION**

8 Several corticosteroids are physiological activators of the MR in cartilaginous fishes,  
9 ray-finned fishes and tetrapods. Interestingly, Aldo, the mineralocorticoid for terrestrial  
10 vertebrates, first appears in lungfish [45]. Nevertheless, Aldo is a potent activator of the  
11 lamprey CR [6], which is ancestral to the MR [5-7, 11]. Interestingly, F, DOC, B and S and  
12 Prog also are transcriptional activators of the CR in lamprey and hagfish [6], with only S, thus far,  
13 found to have mineralocorticoid activity in lamprey [12, 13]. In skate, which has separate MR  
14 and GR genes, Aldo, F, DOC and B are strong transcriptional activators of the MR [14]. F,  
15 DOC, B, S and Prog are found in teleosts [26] and F and DOC have been proposed to be  
16 transcriptional activators of teleost MRs [4, 15-19, 21, 22, 24, 25].

17 Absent, until now, was information about the response to corticosteroids of MRs in  
18 sturgeon and gar, two basal fish that fill in the gap between elasmobranchs and teleosts (Figure 2).  
19 Here we report that sturgeon MR and gar MR have EC<sub>50</sub>s below 1 nM for Aldo, F, DOC, B, S  
20 and Prog. Interestingly, we find that zebrafish MR also has a similar strong response to these  
21 corticosteroids and Prog. Moreover, spiron and 19norP are agonists for sturgeon, gar and  
22 zebrafish MRs. This low selectivity for 3-keto-steroids (Figure 1) that can activate these fish  
23 MRs resembles the response to these steroids by lamprey and hagfish CR [6] and skate MR [14].  
24 Thus, this strong response of the MR to a broad panel of 3-keto-steroids was conserved after the  
25 third whole-genome duplication at the base of the teleosts [30-32, 46].

26 In contrast, human MR is more selective for 3-keto-steroids with higher EC<sub>50</sub>s for S and  
27 Prog. Our data showing weak activation by Prog and 19norP of human MR is in agreement  
28 with other studies [35-37]. The strong response to Prog, spiron and 19norP of ray-finned fish  
29 MR is interesting in the light of the report by Geller et al. [27] that human MR with a Ser810Leu  
30 mutation was activated by 1 nM Prog, 19norP and spiron. Mutagenesis studies and structural  
31 analyses of the MR-Leu810 mutant led to the hypothesis that Leu-810 on  $\alpha$ -helix 5 has  
32 stabilizing van der Waals contacts with Ala-773 on  $\alpha$ -helix 3 [27, 37, 38] to explain the strong  
33 transcriptional activation by Prog, 19norP and spiron. This serine and alanine are conserved in  
34 and sturgeon and gar MRs, as well as in zebrafish MR (Figure 7) [4] and other teleost MRs  
35 indicating that other mechanism(s) can lead to a strong response of sturgeon, gar and zebrafish  
36 MR to Prog, 19norP and spiron. Activation by Prog of zebrafish MR is of concern because

1 zebrafish is an established model system for studying gene regulation in teleosts, as well as  
2 providing insights into human physiology [47]. Prog activation of zebrafish MR may confound  
3 data that focuses on activation of the PR. Prog may also be an agonist for the MR in medaka  
4 and other teleosts that have a serine and alanine that correspond to Ser-810 and Ala-773 in  
5 human MR.

6

### 7 **Mechanisms for regulation of steroid activation of ray-finned fish MR**

8 The strong response of zebrafish MR, as well as sturgeon and gar MRs, to five  
9 corticosteroids, Prog, 19norP and spiron requires one or more mechanisms to provide  
10 steroid-specific regulation of transcriptional activation of these ray-finned fish MRs. At this  
11 time, such mechanisms in gar, sturgeon and zebrafish MRs or other ray-finned fish MRs are  
12 poorly understood. Clues for possible mechanisms may be found from insights into regulation  
13 of mammalian MRs [4, 11, 48-53]. One possibility is an important mechanism in epithelial  
14 cells for regulating access of F and B to mammalian MR by tissue specific expression of  
15 11 $\beta$ -HSD2, which selectively converts F and B, respectively, to cortisone (E) and  
16 11-dehydrocortisone (A), two inactive steroids. Aldo is inert to 11 $\beta$ -HSD2, allowing Aldo to  
17 occupy the MR in epithelial cells in which 11 $\beta$ -HSD2 inactivates F and B [11, 51, 52].  
18 11 $\beta$ -HSD2 is found in ray-finned fish [54, 55], including sturgeon (Accession: ALE30175) and gar  
19 (Accession: XP\_006641583). Expression of 11 $\beta$ -HSD2 in MR-containing tissues provides a  
20 mechanism to exclude F and B from the MR. DOC, S and Prog, which have low EC<sub>50</sub>s in gar,  
21 sturgeon and zebrafish, lack an 11 $\beta$ -hydroxyl group and are inert to 11 $\beta$ -HSD2.

22 Other regulatory mechanisms of the response of the MR to 3-keto-steroids include  
23 tissue-selective synthesis of 3-keto-steroids [5, 56-58], selective sequestration of 3-keto-steroids  
24 to plasma proteins [48, 53, 59], steroid-specific conformational changes that regulate MR  
25 binding of co-activators [60-64], effects of inter-domain interactions between the NTD and the  
26 LBD [19, 50, 64, 65] and post-translational modifications, such as phosphorylation, and  
27 SUMOylation [49, 66, 67].

28

### 29 **Authors Contributions**

30 A.S., K.O., R.S., and S.A. carried out the research. M.E.B. and Y.K. conceived and  
31 designed the experiments and wrote the paper. All authors gave final approval for  
32 publication. We have no competing interests.

33

### 34 **Acknowledgments**

35 We thank colleagues in our laboratories. We also thank Drs. Arlette Hernandez-Franyutti and  
36 Mari Carmen for providing gar tissues.

1

## 2 **Funding**

3 K.O. was supported by the Japan Society for the Promotion of Science (JSPS) Research  
4 Fellowships for Young Scientists. This work was supported in part by Grants-in-Aid for  
5 Scientific Research 23570067 and 26440159 (YK) from the Ministry of Education, Culture,  
6 Sports, Science and Technology of Japan.

7

## 8 **References**

- 9 1 Lu, N. Z., Wardell, S. E., Burnstein, K. L., Defranco, D., Fuller, P. J., Giguere,  
10 V., Hochberg, R. B., McKay, L., Renoir, J. M., Weigel, N. L., Wilson, E. M., McDonnell,  
11 D. P. and Cidlowski, J. A. (2006) International Union of Pharmacology. LXV. The  
12 pharmacology and classification of the nuclear receptor superfamily: glucocorticoid,  
13 mineralocorticoid, progesterone, and androgen receptors. *Pharmacological reviews*. **58**,  
14 782-797
- 15 2 Markov, G. V., Tavares, R., Dauphin-Villemant, C., Demeneix, B. A., Baker,  
16 M. E. and Laudet, V. (2009) Independent elaboration of steroid hormone signaling  
17 pathways in metazoans. *Proc Natl Acad Sci U S A*. **106**, 11913-11918
- 18 3 Bridgham, J. T., Eick, G. N., Larroux, C., Deshpande, K., Harms, M. J.,  
19 Gauthier, M. E., Ortlund, E. A., Degnan, B. M. and Thornton, J. W. (2010) Protein  
20 evolution by molecular tinkering: diversification of the nuclear receptor superfamily  
21 from a ligand-dependent ancestor. *PLoS biology*. **8**
- 22 4 Baker, M. E., Funder, J. W. and Kattoula, S. R. (2013) Evolution of hormone  
23 selectivity in glucocorticoid and mineralocorticoid receptors. *J Steroid Biochem Mol*  
24 *Biol*. **137**, 57-70
- 25 5 Baker, M. E., Nelson, D. R. and Studer, R. A. (2015) Origin of the response to  
26 adrenal and sex steroids: Roles of promiscuity and co-evolution of enzymes and steroid  
27 receptors. *J Steroid Biochem Mol Biol*. **151**, 12-24
- 28 6 Bridgham, J. T., Carroll, S. M. and Thornton, J. W. (2006) Evolution of  
29 hormone-receptor complexity by molecular exploitation. *Science*. **312**, 97-101
- 30 7 Thornton, J. W. (2001) Evolution of vertebrate steroid receptors from an  
31 ancestral estrogen receptor by ligand exploitation and serial genome expansions. *Proc*  
32 *Natl Acad Sci U S A*. **98**, 5671-5676
- 33 8 Funder, J. W. (2012) Aldosterone and mineralocorticoid receptors: a personal  
34 reflection. *Molecular and cellular endocrinology*. **350**, 146-150
- 35 9 Hawkins, U. A., Gomez-Sanchez, E. P., Gomez-Sanchez, C. M. and  
36 Gomez-Sanchez, C. E. (2012) The ubiquitous mineralocorticoid receptor: clinical

- 1 implications. *Curr Hypertens Rep.* **14**, 573-580
- 2 10 Martinerie, L., Munier, M., Le Menuet, D., Meduri, G., Viengchareun, S. and  
3 Lombes, M. (2013) The mineralocorticoid signaling pathway throughout development:  
4 expression, regulation and pathophysiological implications. *Biochimie.* **95**, 148-157
- 5 11 Rossier, B. C., Baker, M. E. and Studer, R. A. (2015) Epithelial sodium  
6 transport and its control by aldosterone: the story of our internal environment revisited.  
7 *Physiological reviews.* **95**, 297-340
- 8 12 Close, D. A., Yun, S. S., McCormick, S. D., Wildbill, A. J. and Li, W. (2010)  
9 11-deoxycortisol is a corticosteroid hormone in the lamprey. *Proc Natl Acad Sci U S A.*  
10 **107**, 13942-13947
- 11 13 Roberts, B. W., Didier, W., Rai, S., Johnson, N. S., Libants, S., Yun, S. S. and  
12 Close, D. A. (2014) Regulation of a putative corticosteroid,  
13 17,21-dihydroxypregn-4-ene,3,20-one, in sea lamprey, *Petromyzon marinus*. *Gen Comp*  
14 *Endocrinol.* **196**, 17-25
- 15 14 Carroll, S. M., Bridgham, J. T. and Thornton, J. W. (2008) Evolution of  
16 hormone signaling in elasmobranchs by exploitation of promiscuous receptors.  
17 *Molecular biology and evolution.* **25**, 2643-2652
- 18 15 Greenwood, A. K., Butler, P. C., White, R. B., DeMarco, U., Pearce, D. and  
19 Fernald, R. D. (2003) Multiple corticosteroid receptors in a teleost fish: distinct  
20 sequences, expression patterns, and transcriptional activities. *Endocrinology.* **144**,  
21 4226-4236
- 22 16 Sturm, A., Bury, N., Dengreville, L., Fagart, J., Flouriot, G., Rafestin-Oblin, M.  
23 E. and Prunet, P. (2005) 11-deoxycorticosterone is a potent agonist of the rainbow trout  
24 (*Oncorhynchus mykiss*) mineralocorticoid receptor. *Endocrinology.* **146**, 47-55
- 25 17 Stolte, E. H., de Mazon, A. F., Leon-Koosterziel, K. M., Jesiak, M., Bury, N.  
26 R., Sturm, A., Savelkoul, H. F., van Kemenade, B. M. and Flik, G. (2008) Corticosteroid  
27 receptors involved in stress regulation in common carp, *Cyprinus carpio*. *J Endocrinol.*  
28 **198**, 403-417
- 29 18 Arterbery, A. S., Fergus, D. J., Fogarty, E. A., Mayberry, J., Deitcher, D. L.,  
30 Lee Kraus, W. and Bass, A. H. (2011) Evolution of ligand specificity in vertebrate  
31 corticosteroid receptors. *BMC Evol Biol.* **11**, 14
- 32 19 Pippal, J. B., Cheung, C. M., Yao, Y. Z., Brennan, F. E. and Fuller, P. J. (2011)  
33 Characterization of the zebrafish (*Danio rerio*) mineralocorticoid receptor. *Molecular*  
34 *and cellular endocrinology.* **332**, 58-66
- 35 20 Jiang, J. Q., Young, G., Kobayashi, T. and Nagahama, Y. (1998) Eel (*Anguilla*  
36 *japonica*) testis 11beta-hydroxylase gene is expressed in interrenal tissue and its product

- 1 lacks aldosterone synthesizing activity. *Molecular and cellular endocrinology*. **146**,  
2 207-211
- 3 21 Baker, M. E. (2003) Evolution of glucocorticoid and mineralocorticoid  
4 responses: go fish. *Endocrinology*. **144**, 4223-4225
- 5 22 Bury, N. R. and Sturm, A. (2007) Evolution of the corticosteroid receptor  
6 signalling pathway in fish. *Gen Comp Endocrinol*. **153**, 47-56
- 7 23 Baker, M. E., Chandsawangbhuwana, C. and Ollikainen, N. (2007) Structural  
8 analysis of the evolution of steroid specificity in the mineralocorticoid and  
9 glucocorticoid receptors. *BMC Evol Biol*. **7**, 24
- 10 24 Sakamoto, T., Mori, C., Minami, S., Takahashi, H., Abe, T., Ojima, D., Ogoshi,  
11 M. and Sakamoto, H. (2011) Corticosteroids stimulate the amphibious behavior in  
12 mudskipper: potential role of mineralocorticoid receptors in teleost fish. *Physiol Behav*.  
13 **104**, 923-928
- 14 25 Takahashi, H. and Sakamoto, T. (2013) The role of 'mineralocorticoids' in  
15 teleost fish: relative importance of glucocorticoid signaling in the osmoregulation and  
16 'central' actions of mineralocorticoid receptor. *Gen Comp Endocrinol*. **181**, 223-228
- 17 26 Milla, S., Wang, N., Mandiki, S. N. and Kestemont, P. (2009) Corticosteroids:  
18 Friends or foes of teleost fish reproduction? *Comparative biochemistry and physiology*.  
19 Part A, *Molecular & integrative physiology*. **153**, 242-251
- 20 27 Geller, D. S., Farhi, A., Pinkerton, N., Fradley, M., Moritz, M., Spitzer, A.,  
21 Meinke, G., Tsai, F. T., Sigler, P. B. and Lifton, R. P. (2000) Activating  
22 mineralocorticoid receptor mutation in hypertension exacerbated by pregnancy. *Science*.  
23 **289**, 119-123
- 24 28 Gilmour, K. M. (2005) Mineralocorticoid receptors and hormones: fishing for  
25 answers. *Endocrinology*. **146**, 44-46
- 26 29 Prunet, P., Sturm, A. and Milla, S. (2006) Multiple corticosteroid receptors in  
27 fish: from old ideas to new concepts. *Gen Comp Endocrinol*. **147**, 17-23
- 28 30 Jaillon, O., Aury, J. M., Brunet, F., Petit, J. L., Stange-Thomann, N., Mauceli,  
29 E., Bouneau, L., Fischer, C., Ozouf-Costaz, C., Bernot, A., Nicaud, S., Jaffe, D., Fisher,  
30 S., Lutfalla, G., Dossat, C., Segurens, B., Dasilva, C., Salanoubat, M., Levy, M., Boudet,  
31 N., Castellano, S., Anthonard, V., Jubin, C., Castelli, V., Katinka, M., Vacherie, B.,  
32 Biemont, C., Skalli, Z., Cattolico, L., Poulain, J., De Berardinis, V., Cruaud, C., Duprat,  
33 S., Brottier, P., Coutanceau, J. P., Gouzy, J., Parra, G., Lardier, G., Chapple, C.,  
34 McKernan, K. J., McEwan, P., Bosak, S., Kellis, M., Volff, J. N., Guigo, R., Zody, M. C.,  
35 Mesirov, J., Lindblad-Toh, K., Birren, B., Nusbaum, C., Kahn, D., Robinson-Rechavi,  
36 M., Laudet, V., Schachter, V., Quetier, F., Saurin, W., Scarpelli, C., Wincker, P., Lander,



- 1 E. S., Weissenbach, J. and Roest Crolius, H. (2004) Genome duplication in the teleost  
2 fish *Tetraodon nigroviridis* reveals the early vertebrate proto-karyotype. *Nature*. **431**,  
3 946-957
- 4 31 Kasahara, M., Naruse, K., Sasaki, S., Nakatani, Y., Qu, W., Ahsan, B., Yamada,  
5 T., Nagayasu, Y., Doi, K., Kasai, Y., Jindo, T., Kobayashi, D., Shimada, A., Toyoda, A.,  
6 Kuroki, Y., Fujiyama, A., Sasaki, T., Shimizu, A., Asakawa, S., Shimizu, N., Hashimoto,  
7 S., Yang, J., Lee, Y., Matsushima, K., Sugano, S., Sakaizumi, M., Narita, T., Ohishi, K.,  
8 Haga, S., Ohta, F., Nomoto, H., Nogata, K., Morishita, T., Endo, T., Shin, I. T., Takeda,  
9 H., Morishita, S. and Kohara, Y. (2007) The medaka draft genome and insights into  
10 vertebrate genome evolution. *Nature*. **447**, 714-719
- 11 32 Katsu, Y., Kohno, S., Hyodo, S., Ijiri, S., Adachi, S., Hara, A., Guillelte, L. J.,  
12 Jr. and Iguchi, T. (2008) Molecular cloning, characterization, and evolutionary analysis  
13 of estrogen receptors from phylogenetically ancient fish. *Endocrinology*. **149**,  
14 6300-6310
- 15 33 Oka, K., Hoang, A., Okada, D., Iguchi, T., Baker, M. E. and Katsu, Y. (2015)  
16 Allosteric role of the amino-terminal A/B domain on corticosteroid transactivation of  
17 gar and human glucocorticoid receptors. *J Steroid Biochem Mol Biol*. **154**, 112-119
- 18 34 Katsu, Y., Kohno, S., Oka, K. and Baker, M. E. (2016) Evolution of  
19 corticosteroid specificity for human, chicken, alligator and frog glucocorticoid receptors.  
20 *Steroids*. **113**, 38-45
- 21 35 Rupprecht, R., Reul, J. M., van Steensel, B., Spengler, D., Soder, M., Berning,  
22 B., Holsboer, F. and Damm, K. (1993) Pharmacological and functional characterization  
23 of human mineralocorticoid and glucocorticoid receptor ligands. *Eur J Pharmacol*. **247**,  
24 145-154
- 25 36 Fagart, J., Wurtz, J. M., Souque, A., Hellal-Levy, C., Moras, D. and  
26 Rafestin-Oblin, M. E. (1998) Antagonism in the human mineralocorticoid receptor. *The*  
27 *EMBO journal*. **17**, 3317-3325
- 28 37 Bledsoe, R. K., Madauss, K. P., Holt, J. A., Apolito, C. J., Lambert, M. H.,  
29 Pearce, K. H., Stanley, T. B., Stewart, E. L., Trump, R. P., Willson, T. M. and Williams,  
30 S. P. (2005) A ligand-mediated hydrogen bond network required for the activation of the  
31 mineralocorticoid receptor. *The Journal of biological chemistry*. **280**, 31283-31293
- 32 38 Fagart, J., Huyet, J., Pinon, G. M., Rochel, M., Mayer, C. and Rafestin-Oblin,  
33 M. E. (2005) Crystal structure of a mutant mineralocorticoid receptor responsible for  
34 hypertension. *Nature structural & molecular biology*. **12**, 554-555
- 35 39 Saitou, N. and Nei, M. (1987) The neighbor-joining method: a new method  
36 for reconstructing phylogenetic trees. *Molecular biology and evolution*. **4**, 406-425

- 1 40 Edgar, R. C. (2004) MUSCLE: multiple sequence alignment with high  
2 accuracy and high throughput. *Nucleic acids research*. **32**, 1792-1797
- 3 41 Felsenstein, J. (1985) Confidence-Limits on Phylogenies - an Approach Using  
4 the Bootstrap. *Evolution*. **39**, 783-791
- 5 42 Tamura, K., Peterson, D., Peterson, N., Stecher, G., Nei, M. and Kumar, S.  
6 (2011) MEGA5: molecular evolutionary genetics analysis using maximum likelihood,  
7 evolutionary distance, and maximum parsimony methods. *Molecular biology and*  
8 *evolution*. **28**, 2731-2739
- 9 43 Kadlecova, Z., Nallet, S., Hacker, D. L., Baldi, L., Klok, H. A. and Wurm, F.  
10 M. (2012) Poly(ethyleneimine)-mediated large-scale transient gene expression:  
11 influence of molecular weight, polydispersity and N-propionyl groups. *Macromol*  
12 *Biosci*. **12**, 628-636
- 13 44 Oka, K., Kohno, S., Urushitani, H., Guillette, L. J., Jr., Ohta, Y., Iguchi, T. and  
14 Katsu, Y. (2013) Molecular cloning and characterization of the corticoid receptors from  
15 the American alligator. *Molecular and cellular endocrinology*. **365**, 153-161
- 16 45 Joss, J. M. P., Arnoldreed, D. E. and Balment, R. J. (1994) The Steroidogenic  
17 Response to Angiotensin-Ii in the Australian Lungfish, *Neoceratodus-Forsteri*. *J Comp*  
18 *Physiol B*. **164**, 378-382
- 19 46 Inoue, J., Sato, Y., Sinclair, R., Tsukamoto, K. and Nishida, M. (2015) Rapid  
20 genome reshaping by multiple-gene loss after whole-genome duplication in teleost fish  
21 suggested by mathematical modeling. *Proc Natl Acad Sci U S A*. **112**, 14918-14923
- 22 47 Tokarz, J., Moller, G., de Angelis, M. H. and Adamski, J. (2013) Zebrafish and  
23 steroids: what do we know and what do we need to know? *J Steroid Biochem Mol Biol*.  
24 **137**, 165-173
- 25 48 Funder, J. and Myles, K. (1996) Exclusion of corticosterone from epithelial  
26 mineralocorticoid receptors is insufficient for selectivity of aldosterone action: in vivo  
27 binding studies. *Endocrinology*. **137**, 5264-5268
- 28 49 Pascual-Le Tallec, L. and Lombes, M. (2005) The mineralocorticoid receptor:  
29 a journey exploring its diversity and specificity of action. *Mol Endocrinol*. **19**,  
30 2211-2221
- 31 50 Fuller, P. J., Yao, Y., Yang, J. and Young, M. J. (2012) Mechanisms of ligand  
32 specificity of the mineralocorticoid receptor. *J Endocrinol*. **213**, 15-24
- 33 51 Odermatt, A. and Kratschmar, D. V. (2012) Tissue-specific modulation of  
34 mineralocorticoid receptor function by 11beta-hydroxysteroid dehydrogenases: an  
35 overview. *Molecular and cellular endocrinology*. **350**, 168-186
- 36 52 Chapman, K., Holmes, M. and Seckl, J. (2013) 11beta-hydroxysteroid

- 1 dehydrogenases: intracellular gate-keepers of tissue glucocorticoid action. *Physiological*  
2 *reviews.* **93**, 1139-1206
- 3 53 Sivukhina, E. V. and Jirikowski, G. F. (2014) Adrenal steroids in the brain:  
4 role of the intrinsic expression of corticosteroid-binding globulin (CBG) in the stress  
5 response. *Steroids.* **81**, 70-73
- 6 54 Kusakabe, M., Nakamura, I. and Young, G. (2003) 11beta-hydroxysteroid  
7 dehydrogenase complementary deoxyribonucleic acid in rainbow trout: cloning, sites of  
8 expression, and seasonal changes in gonads. *Endocrinology.* **144**, 2534-2545
- 9 55 Baker, M. E. (2010) 11Beta-hydroxysteroid dehydrogenase-type 2 evolved  
10 from an ancestral 17beta-hydroxysteroid dehydrogenase-type 2. *Biochemical and*  
11 *biophysical research communications.* **399**, 215-220
- 12 56 Nebert, D. W. and Russell, D. W. (2002) Clinical importance of the  
13 cytochromes P450. *Lancet.* **360**, 1155-1162
- 14 57 Payne, A. H. and Hales, D. B. (2004) Overview of steroidogenic enzymes in  
15 the pathway from cholesterol to active steroid hormones. *Endocr Rev.* **25**, 947-970
- 16 58 Taves, M. D., Plumb, A. W., Sandkam, B. A., Ma, C., Van Der Gugten, J. G.,  
17 Holmes, D. T., Close, D. A., Abraham, N. and Soma, K. K. (2015) Steroid profiling  
18 reveals widespread local regulation of glucocorticoid levels during mouse development.  
19 *Endocrinology.* **156**, 511-522
- 20 59 Breuner, C. W. and Orchinik, M. (2002) Plasma binding proteins as mediators  
21 of corticosteroid action in vertebrates. *J Endocrinol.* **175**, 99-112
- 22 60 Bledsoe, R. K., Montana, V. G., Stanley, T. B., Delves, C. J., Apolito, C. J.,  
23 McKee, D. D., Consler, T. G., Parks, D. J., Stewart, E. L., Willson, T. M., Lambert, M.  
24 H., Moore, J. T., Pearce, K. H. and Xu, H. E. (2002) Crystal structure of the  
25 glucocorticoid receptor ligand binding domain reveals a novel mode of receptor  
26 dimerization and coactivator recognition. *Cell.* **110**, 93-105
- 27 61 Li, Y., Suino, K., Daugherty, J. and Xu, H. E. (2005) Structural and  
28 biochemical mechanisms for the specificity of hormone binding and coactivator  
29 assembly by mineralocorticoid receptor. *Mol Cell.* **19**, 367-380
- 30 62 Hultman, M. L., Krasnoperova, N. V., Li, S., Du, S., Xia, C., Dietz, J. D., Lala,  
31 D. S., Welsch, D. J. and Hu, X. (2005) The ligand-dependent interaction of  
32 mineralocorticoid receptor with coactivator and corepressor peptides suggests multiple  
33 activation mechanisms. *Mol Endocrinol.* **19**, 1460-1473
- 34 63 Khan, S. H., Awasthi, S., Guo, C., Goswami, D., Ling, J., Griffin, P. R.,  
35 Simons, S. S., Jr. and Kumar, R. (2012) Binding of the N-terminal region of coactivator  
36 TIF2 to the intrinsically disordered AF1 domain of the glucocorticoid receptor is

- 1 accompanied by conformational reorganizations. *The Journal of biological chemistry*.  
2 **287**, 44546-44560
- 3 64 Fuller, P. J. (2015) Novel interactions of the mineralocorticoid receptor.  
4 *Molecular and cellular endocrinology*. **408**, 33-37
- 5 65 Pippal, J. B., Yao, Y., Rogerson, F. M. and Fuller, P. J. (2009) Structural and  
6 functional characterization of the interdomain interaction in the mineralocorticoid  
7 receptor. *Mol Endocrinol*. **23**, 1360-1370
- 8 66 Bhargava, A. and Pearce, D. (2004) Mechanisms of mineralocorticoid action:  
9 determinants of receptor specificity and actions of regulated gene products. *Trends*  
10 *Endocrinol Metab*. **15**, 147-153
- 11 67 Faresse, N. (2014) Post-translational modifications of the mineralocorticoid  
12 receptor: How to dress the receptor according to the circumstances? *J Steroid Biochem*  
13 *Mol Biol*. **143**, 334-342
- 14
